# Supplementary material
Source: PubMed Central journal article supplement (PMC7904668)
Supplement: NIHMS1659913-supplement-10822_2020_362_MOESM1_ESM.pdf [file NIHMS1659913-supplement-10822_2020_362_MOESM1_ESM.pdf]

**Table S1. SMILES and InChI identifiers of SAMPL6 pK<sub>a</sub> Challenge molecules.** A CSV version of this table can be found in *SAMPL6-supplementary-documents.tar.gz*. SMILES were generated by OpenEye OEChem [32]

| SAMPL6 Molecule ID | Isomeric SMILES                                                      | InChI                                                                                                                                                           |
|--------------------|----------------------------------------------------------------------|-----------------------------------------------------------------------------------------------------------------------------------------------------------------|
| SM01               | <chem>c1cc2c(cc1O)c3c(o2)C(=O)NCCC3</chem>                           | InChI=1S/C12H11NO3/c14-7-3-4-10-9(6-7)8-2-1-5-13-12(15)11(8)16-10/h3-4,6,14H,1-2,5H2,(H,13,15)                                                                  |
| SM02               | <chem>c1ccc2c(c1)c(ncn2)Nc3cccc(c3)C(F)F</chem>                      | InChI=1S/C15H10F3N3/c16-15(17,18)10-4-3-5-11(8-10)21-14-12-6-1-2-7-13(12)19-9-20-14/h1-9H,(H,19,20,21)                                                          |
| SM03               | <chem>c1ccc(cc1)Cc2nnc(s2)NC(=O)c3cccc3</chem>                       | InChI=1S/C14H11N3OS2/c18-13(11-7-4-8-19-11)15-14-17-16-12(20-14)9-10-5-2-1-3-6-10/h1-8H,9H2,(H,15,17,18)                                                        |
| SM04               | <chem>c1ccc2c(c1)c(ncn2)NCc3ccc(cc3)Cl</chem>                        | InChI=1S/C15H12ClN3/c16-12-7-5-11(6-8-12)9-17-15-13-3-1-2-4-14(13)18-10-19-15/h1-8,10H,9H2,(H,17,18,19)                                                         |
| SM05               | <chem>c1ccc(c(c1)NC(=O)c2ccc(o2)Cl)N3CCCC3</chem>                    | InChI=1S/C16H17ClN2O2/c17-15-9-8-14(21-15)16(20)18-12-6-2-3-7-13(12)19-10-4-1-5-11-19/h2-3,6-9H,1,4-5,10-11H2,(H,18,20)                                         |
| SM06               | <chem>c1cc2cccnc2c(c1)NC(=O)c3cc(cnc3)Br</chem>                      | InChI=1S/C15H10BrN3O/c16-12-7-11(8-17-9-12)15(20)19-13-5-1-3-10-4-2-6-18-14(10)13/h1-9H,(H,19,20)                                                               |
| SM07               | <chem>c1ccc(c1)CNc2c3cccc3ncn2</chem>                                | InChI=1S/C15H13N3/c1-2-6-12(7-3-1)10-16-15-13-8-4-5-9-14(13)17-11-18-15/h1-9,11H,10H2,(H,16,17,18)                                                              |
| SM08               | <chem>Cc1ccc2c(c1)c(c(c=O)[nH]2)CC(=O)O)c3cccc3</chem>               | InChI=1S/C18H15NO3/c1-11-7-8-15-13(9-11)17(12-5-3-2-4-6-12)14(10-16)20(21)18(22)19-15/h2-9H,10H2,1H3,(H,19,22)(H,20,21)                                         |
| SM09               | <chem>COc1cccc(c1)Nc2c3cccc3ncn2Cl</chem>                            | InChI=1S/C15H13N3O.ClH/c1-19-12-6-4-5-11(9-12)18-15-13-7-2-3-8-14(13)16-10-17-15/h2-10H,1H3,(H,16,17,18);1H                                                     |
| SM10               | <chem>c1ccc(cc1)C(=O)NCC(=O)Nc2nc3cccc3s2</chem>                     | InChI=1S/C16H13N3O2S/c20-14(10-17-15(21)11-6-2-1-3-7-11)19-16-18-1-2-8-4-5-9-13(12)22-16/h1-9H,10H2,(H,17,21)(H,18,19,20)                                       |
| SM11               | <chem>c1ccc(cc1)n2c3c(cn2)c(ncn3)N</chem>                            | InChI=1S/C11H9N5/c12-10-9-6-15-16(11)9)14-7-13-10)8-4-2-1-3-5-8/h1-7H,(H2,12,13,14)                                                                             |
| SM12               | <chem>c1ccc2c(c1)c(ncn2)Nc3cccc(c3)Cl.Cl</chem>                      | InChI=1S/C14H10ClN3.ClH/c15-10-4-3-5-11(8-10)18-14-12-6-1-2-7-13(12)16-9-17-14/h1-9H,(H,16,17,18);1H                                                            |
| SM13               | <chem>Cc1cccc(c1)Nc2c3cc(c(cc3ncn2)OC)OC</chem>                      | InChI=1S/C17H17N3O2/c1-11-5-4-6-12(7-11)20-17-13-8-15(21-2)16(22-3)9-14(13)18-10-19-17/h4-10H,1-3H3,(H,18,19,20)                                                |
| SM14               | <chem>c1ccc(cc1)n2cnc3c2ccc(c3)N</chem>                              | InChI=1S/C13H11N3/c14-10-6-7-13-12(8-10)15-9-16(13)11-4-2-1-3-5-11/h1-9H,14H2                                                                                   |
| SM15               | <chem>c1ccc2c(c1)ncn2c3ccc(cc3)O</chem>                              | InChI=1S/C13H10N2O/c16-11-7-5-10(6-8-11)15-9-14-12-3-1-2-4-13(12)15/h1-9,16H                                                                                    |
| SM16               | <chem>c1cc(c(c(c1)Cl)C(=O)Nc2ccncc2)Cl</chem>                        | InChI=1S/C12H8Cl2N2O/c13-9-2-1-3-10(14)11(9)12(17)16-8-4-6-15-7-5-8/h1-7H,(H,15,16,17)                                                                          |
| SM17               | <chem>c1ccc(cc1)CS2nnc(o2)c3ccncc3</chem>                            | InChI=1S/C14H11N3OS/c1-2-4-11(5-3-1)10-19-14-17-16-13(18-14)12-6-8-15-9-7-12/h1-9H,10H2                                                                         |
| SM18               | <chem>c1ccc2c(c1)c(=O)[nH]c2)CCC(=O)Nc3ncc(s3)Cc4ccc(c(c4)F)F</chem> | InChI=1S/C21H16F2N4O2S/c22-15-6-5-12(10-16(15)23)9-13-11-24-21(30-13)27-19(28)8-7-18-25-17-4-2-1-3-14(17)20(29)26-18/h1-6,10-11H,7-9H2,(H,24,27,28)(H,25,26,29) |
| SM19               | <chem>CCOc1ccc2c(c1)sc(n2)NC(=O)Cc3ccc(c(c3)Cl)Cl</chem>             | InChI=1S/C17H14Cl2N2O2S/c1-2-23-11-4-6-14-15(9-11)24-17(20-14)21-16(22)8-10-3-5-12(18)13(19)7-10/h3-7,9H,2,8H2,1H3,(H,20,21,22)                                 |
| SM20               | <chem>c1cc(cc(c1)OCc2ccc(cc2Cl)Cl)/C=C\3\C(=O)NC(=O)S3</chem>        | InChI=1S/C17H11Cl2NO3S/c18-12-5-4-11(14(19)8-12)9-23-13-3-1-2-10(6-13)7-15-16(21)20-17(22)24-15/h1-8H,9H2,(H,20,21,22)/b15-7+                                   |
| SM21               | <chem>c1cc(cc(c1)Br)Nc2c(cnc2)Nc3cccc(c3)Br)F</chem>                 | InChI=1S/C16H11Br2FN4/c17-10-3-1-5-12(7-10)21-15-14(19)9-20-16(23-15)22-13-6-2-4-11(18)8-13/h1-9H,(H2,20,21,22,23)                                              |
| SM22               | <chem>c1cc2c(cc(c2nc1O))l</chem>                                     | InChI=1S/C9H5I2NO/c10-6-4-7(11)9(13)8-5(6)2-1-3-12-8/h1-4,13H                                                                                                   |
| SM23               | <chem>CCOC(=O)c1ccc(cc1)Nc2cc(ncn2)Nc3ccc(cc3)C(=O)OCC)C</chem>      | InChI=1S/C23H24N4O4/c1-4-30-21(28)16-6-10-18(11-7-16)25-20-14-15(3)24-23(27-20)26-19-12-8-17(9-13-19)22(29)31-5-2/h6-14H,4-5H2,1-3H3,(H2,24,25,26,27)           |
| SM24               | <chem>COc1ccc(cc1)c2c3c(ncnc3oc2c4ccc(cc4)OC)NCCO</chem>             | InChI=1S/C22H21N3O4/c1-27-16-7-3-14(4-8-16)18-19-21(23-11-12-26)24-13-25-22(19)29-20(18)15-5-9-17(28-2)10-6-15/h3-10,13,26H,11-12H2,1-2H3,(H,23,24,25)          |

| Microstate ID of Deprotonated State (A)                                                              | Microstate ID of Protonated State (HA)                                                               | Molecule ID | pKa (exp) | pKa SEM (exp) | pKa ID    | Microstate Identification source        |
|------------------------------------------------------------------------------------------------------|------------------------------------------------------------------------------------------------------|-------------|-----------|---------------|-----------|-----------------------------------------|
| 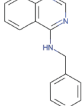<br>SM07_micro004   | <br>SM07_micro006   | SM07        | 6.08      | 0.01          | SM07_pKa1 | NMR measurement                         |
| <br>SM14_micro001   | <br>SM14_micro002   | SM14        | 5.3       | 0.01          | SM14_pKa2 | NMR measurement                         |
| <br>SM14_micro002   | <br>SM14_micro003   | SM14        | 2.58      | 0.01          | SM14_pKa1 | NMR measurement                         |
| <br>SM02_micro002   | <br>SM02_micro004   | SM02        | 5.03      | 0.01          | SM02_pKa1 | Estimated based on SM07 NMR measurement |
| <br>SM04_micro003   | <br>SM04_micro002   | SM04        | 6.02      | 0.01          | SM04_pKa1 | Estimated based on SM07 NMR measurement |
| <br>SM09_micro003  | <br>SM09_micro001  | SM09        | 5.37      | 0.01          | SM09_pKa1 | Estimated based on SM07 NMR measurement |
| <br>SM12_micro012 | <br>SM12_micro006 | SM12        | 5.28      | 0.01          | SM12_pKa1 | Estimated based on SM07 NMR measurement |
| <br>SM13_micro005 | <br>SM13_micro001 | SM13        | 5.77      | 0.01          | SM13_pKa1 | Estimated based on SM07 NMR measurement |
| <br>SM15_micro004 | <br>SM15_micro002 | SM15        | 8.94      | 0.01          | SM15_pKa2 | Estimated based on SM14 NMR measurement |
| <br>SM15_micro002 | <br>SM15_micro003 | SM15        | 4.7       | 0.01          | SM15_pKa1 | Estimated based on SM14 NMR measurement |

**Figure S1. Dominant microstates of 8 molecules were determined based on NMR measurements.** Dominant microstate sequence of 6 analogues were determined taking SM07 and SM14 as reference. Matched experimental  $pK_a$  values were determined by spectrophotometric  $pK_a$  measurements [8]. A CSV version of this table can be found in [SAMPL6-supplementary-documents.tar.gz](https://sampl6-supplementary-documents.tar.gz).

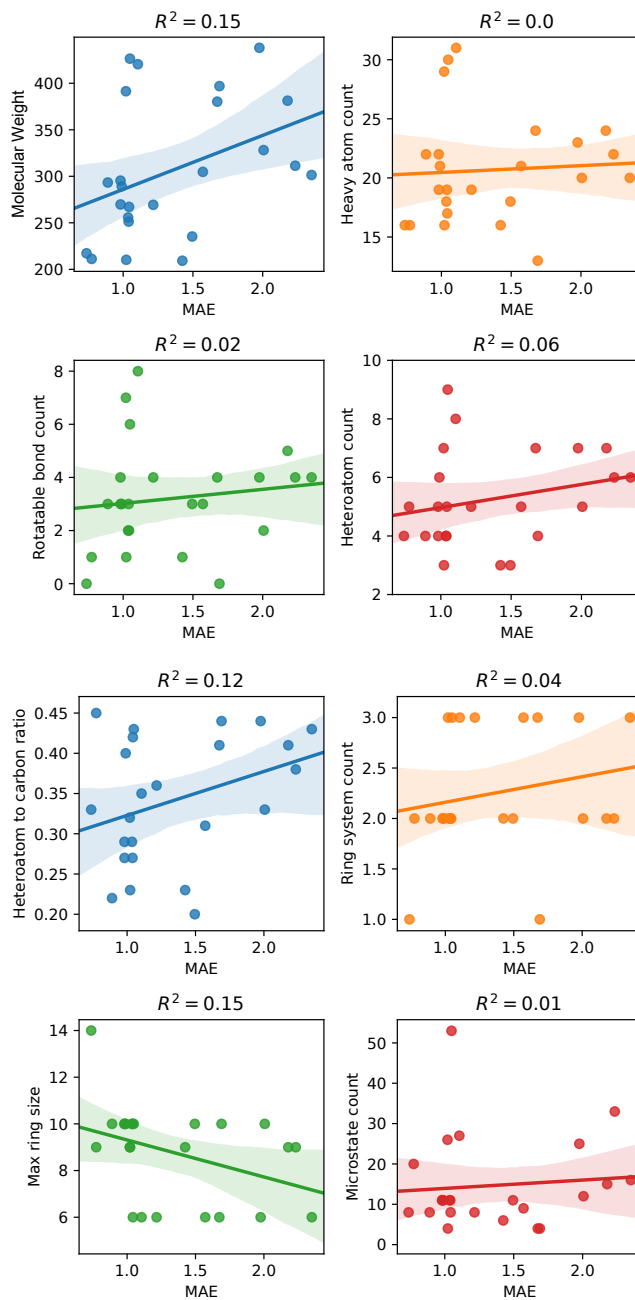

**Figure S2. MAE of macroscopic  $pK_a$  predictions of each molecule did not show any significant correlation with any molecular descriptor.** Plots show regression lines, 95% confidence intervals of the regression lines, and  $R^2$ . The following molecular descriptors were calculated using OpenEye OEMolProp Toolkit [59]: molecular weight, non-terminal rotatable bond count, heteroatom to carbon ratio, maximum ring size, heavy atom count, heteroatom count, ring system count. Microstate count is based on the enumerated microstates for each compounds including additional microstates requested by participants.

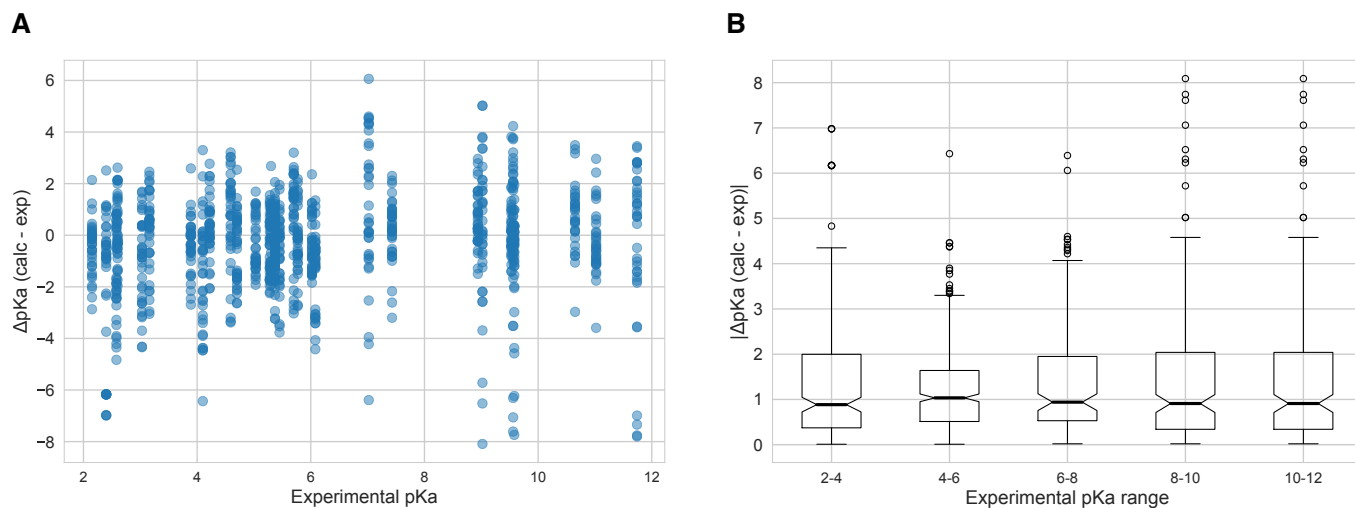

**Figure S3. The value of macroscopic  $pK_a$ s was not a factor affecting prediction error seen in SAMPL6 Challenge according to the analysis with Hungarian matching.** There was not clear trend between  $pK_a$  prediction error and the true  $pK_a$  error. Very high and very low  $pK_a$  values have similar inaccuracy compared to  $pK_a$  values close to 7. **A** Scatter plot of macroscopic  $pK_a$  prediction error calculated with Hungarian matching vs. experimental  $pK_a$  value **B** Box plot of absolute error of macroscopic  $pK_a$  predictions binned into 2  $pK_a$  unit intervals of experimental  $pK_a$ .

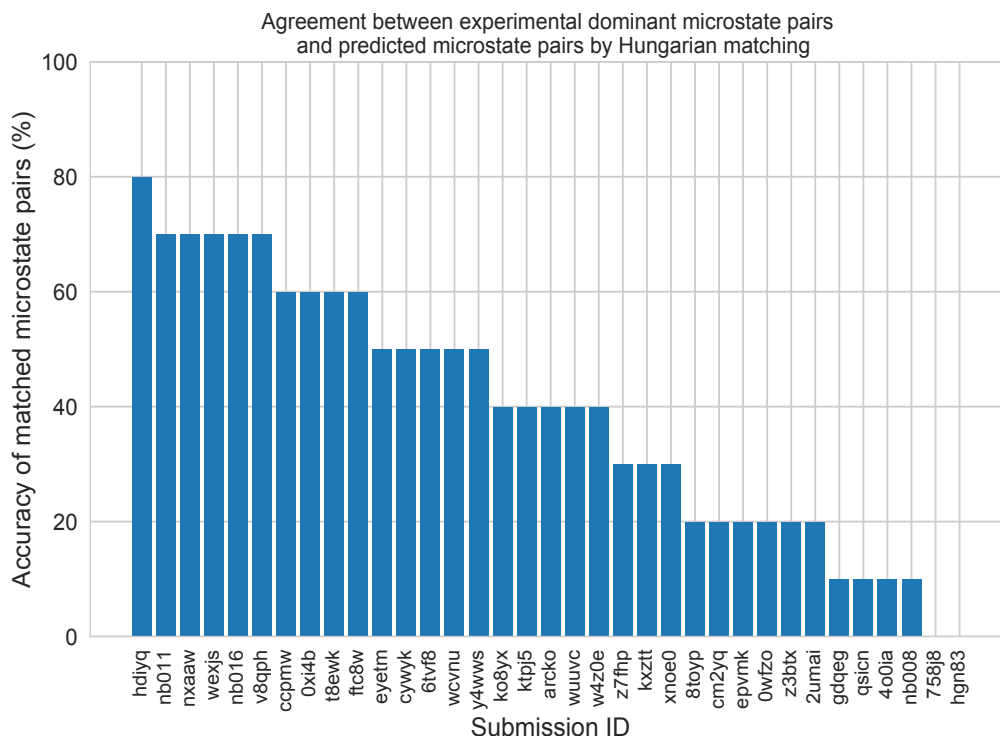

**Figure S4. There was low agreement between experimental dominant microstate pairs and the predicted microstate pairs selected by Hungarian algorithm for microscopic  $pK_a$  predictions.** This analysis could only be performed for 8 molecules with NMR data. Hungarian matching algorithm which matches predicted and experimental values considering only the closeness of the numerical value of  $pK_a$  and it often leads to predicted  $pK_a$  matches that described a different microstates pair than the experimentally observed dominant microstates.

**Table S2. Evaluation statistics calculated for all macroscopic  $pK_a$  prediction submissions based on Hungarian match for 24 molecules.** Methods are represented via their SAMPL6 submission IDs which can be cross-referenced with Table 1 for method details. There are eight error metrics reported: the root-mean-squared error (RMSE), mean absolute error (MAE), mean (signed) error (ME), coefficient of determination ( $R^2$ ), linear regression slope (m), Kendall's Rank Correlation Coefficient ( $\tau$ ), unmatched experimental  $pK_a$ s (number of missing  $pK_a$  predictions) and unmatched predicted  $pK_a$ s (number of extra  $pK_a$  predictions between 2 and 12). This table is ranked by increasing RMSE. A CSV version of this table can be found in *SAMPL6-supplementary-documents.tar.gz*.

| Submission ID | RMSE              | MAE               | ME                   | $R^2$             | m                  | Kendall's Tau      | Unmatched exp. $pK_a$ s | Unmatched pred. $pK_a$ s [2,12] |
|---------------|-------------------|-------------------|----------------------|-------------------|--------------------|--------------------|-------------------------|---------------------------------|
| <i>xvxd</i>   | 0.68 [0.54, 0.81] | 0.58 [0.45, 0.71] | 0.24 [-0.01, 0.45]   | 0.94 [0.88, 0.97] | 0.92 [0.84, 1.02]  | 0.82 [0.68, 0.92]  | 2                       | 4                               |
| <i>gyuhx</i>  | 0.73 [0.55, 0.91] | 0.59 [0.44, 0.74] | 0.03 [-0.23, 0.28]   | 0.93 [0.88, 0.96] | 0.98 [0.90, 1.08]  | 0.88 [0.80, 0.94]  | 0                       | 7                               |
| <i>xmyhm</i>  | 0.79 [0.52, 1.03] | 0.56 [0.38, 0.77] | 0.13 [-0.14, 0.41]   | 0.92 [0.85, 0.97] | 0.96 [0.86, 1.08]  | 0.81 [0.68, 0.90]  | 0                       | 3                               |
| <i>nb017</i>  | 0.94 [0.72, 1.16] | 0.77 [0.58, 0.97] | -0.16 [-0.49, 0.16]  | 0.88 [0.81, 0.94] | 0.94 [0.82, 1.08]  | 0.73 [0.60, 0.84]  | 0                       | 6                               |
| <i>nb007</i>  | 0.95 [0.73, 1.15] | 0.78 [0.60, 0.97] | 0.05 [-0.29, 0.37]   | 0.88 [0.77, 0.95] | 0.84 [0.77, 0.92]  | 0.79 [0.65, 0.89]  | 0                       | 13                              |
| <i>yqkga</i>  | 1.01 [0.78, 1.23] | 0.80 [0.59, 1.03] | -0.17 [-0.51, 0.19]  | 0.87 [0.78, 0.93] | 0.87 [0.78, 1.08]  | 0.93 [0.72, 0.91]  | 0                       | 1                               |
| <i>nb010</i>  | 1.03 [0.77, 1.26] | 0.81 [0.61, 1.04] | 0.24 [-0.11, 0.59]   | 0.87 [0.77, 0.94] | 0.95 [0.83, 1.08]  | 0.80 [0.67, 0.90]  | 0                       | 4                               |
| <i>8xt50</i>  | 1.07 [0.78, 1.36] | 0.81 [0.58, 1.07] | -0.47 [-0.82, -0.14] | 0.91 [0.84, 0.95] | 1.08 [0.94, 1.22]  | 0.80 [0.68, 0.89]  | 0                       | 0                               |
| <i>nb013</i>  | 1.10 [0.72, 1.47] | 0.80 [0.56, 1.09] | -0.15 [-0.55, 0.22]  | 0.88 [0.78, 0.95] | 1.09 [0.90, 1.25]  | 0.79 [0.64, 0.90]  | 0                       | 6                               |
| <i>nb015</i>  | 1.27 [0.98, 1.56] | 1.04 [0.80, 1.31] | 0.13 [-0.32, 0.56]   | 0.87 [0.80, 0.93] | 1.16 [0.94, 1.34]  | 0.78 [0.66, 0.86]  | 0                       | 0                               |
| <i>p0jba</i>  | 1.31 [0.69, 1.73] | 1.08 [0.43, 1.72] | -0.92 [-1.72, -0.11] | 0.91 [0.51, 1.00] | 1.18 [0.36, 1.72]  | 0.80 [0.00, 1.00]  | 0                       | 0                               |
| <i>37xm8</i>  | 1.41 [0.93, 1.84] | 1.01 [0.68, 1.38] | -0.18 [-0.69, 0.32]  | 0.83 [0.70, 0.93] | 1.16 [0.98, 1.33]  | 0.70 [0.56, 0.83]  | 1                       | 1                               |
| <i>mkhqa</i>  | 1.60 [1.13, 2.05] | 1.24 [0.90, 1.62] | -0.32 [-0.89, 0.21]  | 0.80 [0.67, 0.91] | 1.14 [0.98, 1.34]  | 0.64 [0.44, 0.79]  | 0                       | 6                               |
| <i>tjtd0</i>  | 1.64 [1.20, 2.06] | 1.30 [0.96, 1.67] | -0.12 [-0.70, 0.45]  | 0.81 [0.69, 0.91] | 1.2 [1.03, 1.40]   | 0.65 [0.47, 0.80]  | 0                       | 5                               |
| <i>nb001</i>  | 1.68 [1.05, 2.37] | 1.21 [0.84, 1.68] | 0.44 [-0.10, 1.03]   | 0.80 [0.70, 0.90] | 1.16 [0.95, 1.42]  | 0.72 [0.55, 0.85]  | 0                       | 7                               |
| <i>nb002</i>  | 1.70 [1.08, 2.38] | 1.25 [0.89, 1.70] | 0.51 [-0.04, 1.10]   | 0.80 [0.70, 0.90] | 1.15 [0.95, 1.42]  | 0.72 [0.56, 0.84]  | 0                       | 7                               |
| <i>35bdm</i>  | 1.72 [0.66, 2.34] | 1.44 [0.62, 2.26] | -1.01 [-2.18, 0.13]  | 0.92 [0.46, 1.00] | 1.45 [0.73, 2.15]  | 0.80 [0.00, 1.00]  | 0                       | 0                               |
| <i>ryzue</i>  | 1.77 [1.42, 2.12] | 1.50 [1.17, 1.84] | 1.30 [0.86, 1.72]    | 0.91 [0.86, 0.95] | 1.23 [1.06, 1.41]  | 0.82 [0.71, 0.91]  | 0                       | 0                               |
| <i>2ii2g</i>  | 1.80 [1.31, 2.24] | 1.39 [1.01, 1.82] | -0.74 [-1.29, -0.15] | 0.79 [0.65, 0.89] | 1.15 [0.96, 1.37]  | 0.68 [0.59, 0.82]  | 0                       | 2                               |
| <i>mpwiy</i>  | 1.82 [1.39, 2.23] | 1.48 [1.14, 1.88] | 0.10 [-0.54, 0.73]   | 0.82 [0.70, 0.91] | 1.29 [1.12, 1.51]  | 0.66 [0.49, 0.80]  | 0                       | 5                               |
| <i>5byn6</i>  | 1.89 [1.50, 2.27] | 1.59 [1.24, 1.97] | 1.32 [0.84, 1.80]    | 0.91 [0.85, 0.95] | 1.28 [1.10, 1.48]  | 0.83 [0.72, 0.92]  | 0                       | 0                               |
| <i>y75vj</i>  | 1.90 [1.50, 2.26] | 1.58 [1.21, 1.97] | 1.04 [0.46, 1.60]    | 0.89 [0.79, 0.95] | 1.34 [1.16, 1.53]  | 0.75 [0.57, 0.88]  | 1                       | 0                               |
| <i>w4iyd</i>  | 1.93 [1.53, 2.28] | 1.58 [1.20, 1.98] | 1.26 [0.72, 1.76]    | 0.85 [0.74, 0.92] | 1.21 [1.00, 1.40]  | 0.73 [0.57, 0.85]  | 0                       | 1                               |
| <i>np6b4</i>  | 1.94 [1.21, 2.71] | 1.44 [1.04, 1.94] | -0.47 [-1.08, 0.24]  | 0.71 [0.60, 0.87] | 1.08 [0.81, 1.43]  | 0.75 [0.62, 0.86]  | 0                       | 8                               |
| <i>nb004</i>  | 2.01 [1.38, 2.63] | 1.57 [1.16, 2.04] | 0.56 [-0.10, 1.27]   | 0.82 [0.72, 0.90] | 1.35 [1.15, 1.60]  | 0.71 [0.54, 0.84]  | 0                       | 5                               |
| <i>nb003</i>  | 2.01 [1.39, 2.64] | 1.58 [1.18, 2.04] | 0.52 [-0.14, 1.22]   | 0.82 [0.73, 0.91] | 1.36 [1.16, 1.61]  | 0.71 [0.54, 0.84]  | 0                       | 5                               |
| <i>yc70m</i>  | 2.03 [1.73, 2.33] | 1.80 [1.48, 2.13] | -0.41 [-1.09, 0.31]  | 0.47 [0.28, 0.64] | 0.56 [0.35, 0.83]  | 0.53 [0.35, 0.68]  | 0                       | 27                              |
| <i>hytjn</i>  | 2.16 [1.24, 3.06] | 1.39 [0.86, 2.04] | 0.71 [0.03, 1.48]    | 0.45 [0.13, 0.78] | 0.62 [0.26, 1.00]  | 0.47 [0.16, 0.73]  | 1                       | 27                              |
| <i>f0gew</i>  | 2.18 [1.38, 2.95] | 1.58 [1.09, 2.16] | -0.73 [-1.42, 0.04]  | 0.77 [0.67, 0.89] | 1.29 [1.01, 1.63]  | 0.76 [0.63, 0.86]  | 0                       | 0                               |
| <i>q3pfp</i>  | 2.19 [1.33, 3.09] | 1.51 [0.99, 2.13] | 0.59 [-0.10, 1.37]   | 0.44 [0.13, 0.77] | 0.66 [0.27, 1.07]  | 0.50 [0.20, 0.75]  | 1                       | 22                              |
| <i>ds62k</i>  | 2.22 [1.62, 2.81] | 1.78 [1.34, 2.27] | 0.78 [0.06, 1.52]    | 0.82 [0.70, 0.90] | 1.41 [1.20, 1.63]  | 0.72 [0.55, 0.85]  | 0                       | 4                               |
| <i>xikp8</i>  | 2.35 [1.94, 2.73] | 2.06 [1.66, 2.47] | 0.77 [-0.02, 1.58]   | 0.89 [0.80, 0.95] | 1.59 [1.40, 1.81]  | 0.76 [0.59, 0.89]  | 1                       | 0                               |
| <i>nb005</i>  | 2.38 [1.79, 2.95] | 1.91 [1.44, 2.43] | 0.31 [-0.49, 1.15]   | 0.84 [0.74, 0.91] | 1.56 [1.34, 1.82]  | 0.71 [0.54, 0.83]  | 0                       | 0                               |
| <i>5nm4j</i>  | 2.45 [1.42, 3.34] | 1.58 [0.94, 2.34] | 0.05 [-0.80, 1.07]   | 0.19 [0.00, 0.70] | 0.40 [-0.06, 0.81] | 0.34 [-0.04, 0.67] | 4                       | 1                               |
| <i>ad5pu</i>  | 2.54 [1.68, 3.30] | 1.83 [1.24, 2.49] | -0.65 [-1.48, 0.25]  | 0.76 [0.64, 0.88] | 1.43 [1.12, 1.78]  | 0.77 [0.63, 0.88]  | 0                       | 0                               |
| <i>pwn3m</i>  | 2.60 [1.45, 3.53] | 1.54 [0.83, 2.37] | 0.79 [-0.06, 1.77]   | 0.21 [0.00, 0.63] | 0.37 [0.01, 0.78]  | 0.34 [0.04, 0.63]  | 1                       | 3                               |
| <i>nb006</i>  | 2.98 [2.37, 3.56] | 2.53 [2.00, 3.10] | 0.42 [-0.60, 1.47]   | 0.84 [0.74, 0.92] | 1.78 [1.55, 2.06]  | 0.71 [0.54, 0.84]  | 0                       | 0                               |
| <i>h0xtm</i>  | 3.26 [1.81, 4.39] | 1.92 [1.03, 2.98] | 1.38 [0.37, 2.56]    | 0.08 [0.00, 0.48] | 0.28 [-0.17, 0.83] | 0.29 [-0.04, 0.61] | 3                       | 7                               |

**Table S3. Evaluation statistics calculated for all microscopic  $pK_a$  prediction submissions based on Hungarian match for 8 molecules with NMR data.** Methods are represented via their SAMPL6 submission IDs which can be cross-referenced with Table 1 for method details. There are eight error metrics reported: the root-mean-squared error (RMSE), mean absolute error (MAE), mean (signed) error (ME), coefficient of determination ( $R^2$ ), linear regression slope (m), Kendall's Rank Correlation Coefficient ( $\tau$ ), unmatched experimental  $pK_a$ s (number of missing  $pK_a$  predictions) and unmatched predicted  $pK_a$ s (number of extra  $pK_a$  predictions between 2 and 12). This table is ranked by increasing RMSE. A CSV version of this table can be found in *SAMPL6-supplementary-documents.tar.gz*.

| Submission ID | RMSE              | MAE               | ME                  | $R^2$             | m                  | Kendall's Tau     | Unmatched exp. $pK_a$ s | Unmatched pred. $pK_a$ s [2,12] |
|---------------|-------------------|-------------------|---------------------|-------------------|--------------------|-------------------|-------------------------|---------------------------------|
| <i>nb011</i>  | 0.47 [0.30, 0.64] | 0.33 [0.22, 0.46] | -0.02 [-0.18, 0.14] | 0.97 [0.94, 0.99] | 1.01 [0.97, 1.06]  | 0.90 [0.78, 0.96] | 0                       | 36                              |
| <i>hdiyq</i>  | 0.62 [0.47, 0.76] | 0.47 [0.33, 0.62] | 0.13 [-0.09, 0.34]  | 0.95 [0.92, 0.97] | 0.34 [0.92, 1.09]  | 0.87 [0.79, 0.93] | 0                       | 16                              |
| <i>epvmk</i>  | 0.63 [0.43, 0.81] | 0.47 [0.32, 0.63] | -0.02 [-0.25, 0.21] | 0.95 [0.89, 0.98] | 0.21 [0.91, 1.04]  | 0.81 [0.68, 0.91] | 0                       | 37                              |
| <i>xnoe0</i>  | 0.65 [0.47, 0.82] | 0.50 [0.36, 0.66] | -0.1 [-0.32, 0.13]  | 0.95 [0.89, 0.98] | 0.13 [0.92, 1.05]  | 0.82 [0.69, 0.91] | 0                       | 36                              |
| <i>gdqeg</i>  | 0.65 [0.41, 0.89] | 0.43 [0.27, 0.62] | 0.11 [-0.10, 0.35]  | 0.94 [0.88, 0.98] | 0.35 [0.87, 1.02]  | 0.83 [0.67, 0.95] | 0                       | 53                              |
| <i>4o0ia</i>  | 0.66 [0.44, 0.86] | 0.47 [0.31, 0.64] | 0.00 [-0.22, 0.24]  | 0.94 [0.88, 0.98] | 0.24 [0.87, 1.05]  | 0.85 [0.73, 0.94] | 0                       | 35                              |
| <i>nb008</i>  | 0.76 [0.48, 1.02] | 0.52 [0.34, 0.73] | -0.08 [-0.37, 0.17] | 0.93 [0.85, 0.98] | 0.17 [0.79, 0.93]  | 0.84 [0.73, 0.92] | 0                       | 35                              |
| <i>ccpmw</i>  | 0.79 [0.62, 0.94] | 0.62 [0.46, 0.80] | -0.17 [-0.44, 0.11] | 0.92 [0.86, 0.96] | 0.11 [0.82, 1.05]  | 0.80 [0.67, 0.89] | 0                       | 7                               |
| <i>0xi4b</i>  | 0.84 [0.58, 1.07] | 0.61 [0.42, 0.83] | 0.22 [-0.07, 0.51]  | 0.92 [0.84, 0.97] | 0.51 [0.91, 1.09]  | 0.81 [0.65, 0.92] | 0                       | 32                              |
| <i>cywyk</i>  | 0.86 [0.60, 1.10] | 0.62 [0.42, 0.84] | 0.13 [-0.16, 0.44]  | 0.90 [0.82, 0.96] | 0.44 [0.86, 1.08]  | 0.81 [0.64, 0.92] | 0                       | 35                              |
| <i>ftc8w</i>  | 0.86 [0.51, 1.17] | 0.59 [0.39, 0.83] | 0.10 [-0.19, 0.41]  | 0.90 [0.77, 0.97] | 0.41 [0.84, 0.98]  | 0.75 [0.57, 0.88] | 0                       | 35                              |
| <i>nx0aw</i>  | 0.89 [0.56, 1.25] | 0.61 [0.41, 0.87] | -0.02 [-0.35, 0.28] | 0.89 [0.75, 0.97] | 0.28 [0.85, 1.00]  | 0.79 [0.63, 0.91] | 0                       | 29                              |
| <i>nb016</i>  | 0.95 [0.71, 1.18] | 0.77 [0.57, 0.98] | -0.23 [-0.56, 0.12] | 0.89 [0.83, 0.95] | 0.12 [0.82, 1.07]  | 0.75 [0.62, 0.85] | 0                       | 3                               |
| <i>kxzt</i>   | 0.96 [0.56, 1.33] | 0.64 [0.41, 0.92] | 0.00 [-0.32, 0.36]  | 0.90 [0.76, 0.97] | 0.36 [0.96, 1.13]  | 0.79 [0.63, 0.91] | 0                       | 37                              |
| <i>eyetm</i>  | 0.98 [0.69, 1.27] | 0.72 [0.50, 0.97] | -0.32 [-0.65, 0.00] | 0.91 [0.86, 0.96] | 0.00 [0.94, 1.22]  | 0.78 [0.64, 0.88] | 0                       | 7                               |
| <i>cm2yq</i>  | 0.99 [0.44, 1.54] | 0.56 [0.31, 0.90] | 0.10 [-0.21, 0.50]  | 0.91 [0.83, 0.98] | 0.50 [0.96, 1.25]  | 0.89 [0.80, 0.96] | 0                       | 36                              |
| <i>2umai</i>  | 1.00 [0.46, 1.54] | 0.57 [0.33, 0.91] | 0.07 [-0.25, 0.46]  | 0.91 [0.82, 0.98] | 0.46 [0.96, 1.26]  | 0.87 [0.76, 0.95] | 0                       | 36                              |
| <i>ko8yx</i>  | 1.01 [0.76, 1.25] | 0.78 [0.56, 1.01] | 0.35 [0.01, 0.67]   | 0.91 [0.82, 0.96] | 0.67 [0.96, 1.19]  | 0.78 [0.64, 0.89] | 0                       | 26                              |
| <i>wuuvc</i>  | 1.02 [0.51, 1.53] | 0.62 [0.38, 0.93] | 0.19 [-0.13, 0.58]  | 0.88 [0.80, 0.96] | 0.58 [0.85, 1.19]  | 0.90 [0.81, 0.96] | 0                       | 36                              |
| <i>ktpj5</i>  | 1.02 [0.51, 1.56] | 0.61 [0.37, 0.95] | 0.17 [-0.16, 0.57]  | 0.88 [0.80, 0.96] | 0.57 [0.87, 1.22]  | 0.89 [0.80, 0.96] | 0                       | 36                              |
| <i>z7fhp</i>  | 1.02 [0.49, 1.55] | 0.61 [0.36, 0.94] | 0.08 [-0.24, 0.48]  | 0.90 [0.82, 0.97] | 0.48 [0.97, 1.26]  | 0.88 [0.80, 0.95] | 0                       | 28                              |
| <i>arcbo</i>  | 1.04 [0.73, 1.32] | 0.77 [0.53, 1.02] | 0.37 [0.05, 0.72]   | 0.89 [0.80, 0.94] | 0.72 [0.90, 1.14]  | 0.78 [0.62, 0.90] | 0                       | 24                              |
| <i>y4wws</i>  | 1.04 [0.70, 1.33] | 0.74 [0.49, 1.00] | -0.31 [-0.66, 0.05] | 0.91 [0.85, 0.96] | 0.05 [1.02, 1.26]  | 0.79 [0.68, 0.88] | 0                       | 30                              |
| <i>wcvnu</i>  | 1.11 [0.80, 1.39] | 0.84 [0.59, 1.11] | 0.28 [-0.10, 0.66]  | 0.89 [0.77, 0.95] | 0.66 [0.98, 1.22]  | 0.73 [0.54, 0.88] | 1                       | 27                              |
| <i>8toyp</i>  | 1.13 [0.61, 1.65] | 0.70 [0.42, 1.05] | 0.13 [-0.25, 0.56]  | 0.88 [0.81, 0.96] | 0.56 [0.98, 1.29]  | 0.83 [0.72, 0.92] | 0                       | 27                              |
| <i>qsicn</i>  | 1.17 [0.30, 1.65] | 0.88 [0.23, 1.54] | -0.76 [-1.54, 0.01] | 0.91 [0.46, 1.00] | 0.01 [0.52, 1.59]  | 0.80 [0.00, 1.00] | 0                       | 2                               |
| <i>wexjs</i>  | 1.30 [0.95, 1.62] | 0.98 [0.68, 1.29] | 0.27 [-0.17, 0.74]  | 0.86 [0.74, 0.93] | 0.74 [1.00, 1.29]  | 0.73 [0.55, 0.86] | 0                       | 25                              |
| <i>v8qph</i>  | 1.37 [0.92, 1.79] | 0.98 [0.66, 1.34] | -0.15 [-0.64, 0.34] | 0.84 [0.70, 0.93] | 0.34 [0.97, 1.32]  | 0.70 [0.55, 0.82] | 0                       | 6                               |
| <i>w4z0e</i>  | 1.57 [1.18, 1.94] | 1.23 [0.90, 1.58] | 0.09 [-0.48, 0.62]  | 0.85 [0.76, 0.91] | 0.62 [1.08, 1.46]  | 0.72 [0.60, 0.82] | 0                       | 19                              |
| <i>6tvf8</i>  | 1.88 [0.87, 2.85] | 1.02 [0.54, 1.66] | 0.45 [-0.14, 1.18]  | 0.51 [0.16, 0.87] | 1.18 [0.26, 0.89]  | 0.61 [0.34, 0.82] | 0                       | 55                              |
| <i>0wfzo</i>  | 2.89 [1.73, 3.89] | 1.88 [1.17, 2.68] | 0.76 [-0.15, 1.77]  | 0.48 [0.21, 0.75] | 1.77 [0.60, 1.37]  | 0.51 [0.30, 0.70] | 0                       | 4                               |
| <i>t8ewk</i>  | 3.30 [1.89, 4.39] | 1.98 [1.06, 3.00] | 1.32 [0.27, 2.49]   | 0.07 [0.00, 0.45] | 2.49 [-0.17, 0.79] | 0.28 [-0.03, 0.6] | 0                       | 6                               |
| <i>z3btx</i>  | 4.00 [2.30, 5.45] | 2.49 [1.47, 3.65] | 1.48 [0.26, 2.86]   | 0.29 [0.04, 0.60] | 2.86 [0.31, 1.44]  | 0.43 [0.19, 0.63] | 0                       | 1                               |
| <i>758j8</i>  | 4.52 [2.64, 6.18] | 2.95 [1.85, 4.25] | 1.85 [0.48, 3.38]   | 0.24 [0.02, 0.58] | 3.38 [0.20, 1.51]  | 0.34 [0.08, 0.57] | 0                       | 2                               |
| <i>hgn83</i>  | 6.38 [4.04, 8.47] | 4.11 [2.52, 5.93] | 2.13 [0.07, 4.28]   | 0.08 [0.00, 0.39] | 4.28 [-0.18, 1.43] | 0.32 [0.07, 0.56] | 0                       | 0                               |

**Table S4. Evaluation statistics calculated for all microscopic  $pK_a$  prediction submissions based on microstate pair match for 8 molecules with NMR data.** Methods are represented via their SAMPL6 submission IDs which can be cross-referenced with Table 1 for method details. There are eight error metrics reported: the root-mean-squared error (RMSE), mean absolute error (MAE), mean (signed) error (ME), coefficient of determination ( $R^2$ ), linear regression slope (m), Kendall's Rank Correlation Coefficient ( $\tau$ ), unmatched experimental  $pK_a$ s (number of missing  $pK_a$  predictions) and unmatched predicted  $pK_a$ s (number of extra  $pK_a$  predictions between 2 and 12). This table is ranked by increasing RMSE. A CSV version of this table can be found in *SAMPL6-supplementary-documents.tar.gz*.

| Submission ID | RMSE                 | MAE                  | ME                   | $R^2$             | m                   | Kendall's Tau      | Unmatched exp. $pK_a$ s | Unmatched pred. $pK_a$ s [2,12] |
|---------------|----------------------|----------------------|----------------------|-------------------|---------------------|--------------------|-------------------------|---------------------------------|
| <i>nb016</i>  | 0.52 [0.25, 0.71]    | 0.43 [0.23, 0.65]    | -0.09 [-0.45, 0.30]  | 0.92 [0.05, 0.99] | 0.99 [0.14, 1.16]   | 0.62 [-0.14, 1.00] | 0                       | 3                               |
| <i>hdiyq</i>  | 0.68 [0.49, 0.83]    | 0.60 [0.39, 0.80]    | 0.38 [0.02, 0.70]    | 0.86 [0.47, 0.98] | 0.91 [0.45, 1.26]   | 0.78 [0.4, 1.00]   | 0                       | 16                              |
| <i>nb011</i>  | 0.72 [0.35, 1.07]    | 0.54 [0.28, 0.86]    | 0.45 [0.14, 0.83]    | 0.86 [0.18, 0.98] | 0.93 [0.50, 1.21]   | 0.64 [0.26, 0.95]  | 0                       | 36                              |
| <i>ftc8w</i>  | 0.75 [0.52, 0.96]    | 0.68 [0.50, 0.89]    | -0.31 [-0.68, 0.16]  | 0.87 [0.02, 0.99] | 1.12 [-0.11, 1.39]  | 0.56 [-0.10, 1.00] | 0                       | 35                              |
| <i>6tvf8</i>  | 0.76 [0.55, 0.95]    | 0.68 [0.46, 0.90]    | -0.63 [-0.89, -0.35] | 0.92 [0.78, 0.99] | 0.94 [0.69, 1.41]   | 0.87 [0.6, 1.00]   | 0                       | 55                              |
| <i>t8ewk</i>  | 0.96 [0.65, 1.19]    | 0.81 [0.46, 1.13]    | -0.77 [-1.12, -0.38] | 0.80 [0.53, 0.96] | 0.96 [0.76, 2.26]   | 0.78 [0.31, 1.00]  | 1                       | 7                               |
| <i>v8qph</i>  | 0.99 [0.40, 1.52]    | 0.67 [0.29, 1.17]    | -0.09 [-0.75, 0.45]  | 0.68 [0.11, 0.97] | 0.96 [-1.26, 1.16]  | 0.38 [-0.3, 1.00]  | 0                       | 6                               |
| <i>ccpmw</i>  | 1.07 [0.78, 1.27]    | 0.95 [0.60, 1.25]    | -0.83 [-1.25, -0.37] | 0.74 [0.43, 0.99] | 0.95 [0.70, 2.32]   | 0.89 [0.52, 1.00]  | 1                       | 8                               |
| <i>Oxi4b</i>  | 1.15 [0.75, 1.50]    | 0.98 [0.63, 1.36]    | -0.30 [-0.94, 0.44]  | 0.77 [0.02, 0.98] | 1.26 [0.09, 2.10]   | 0.51 [-0.14, 1.00] | 0                       | 33                              |
| <i>cywyk</i>  | 1.17 [0.88, 1.41]    | 1.06 [0.74, 1.35]    | -0.47 [-1.09, 0.24]  | 0.73 [0.02, 0.98] | 1.15 [-0.04, 2.00]  | 0.56 [-0.08, 1.00] | 0                       | 36                              |
| <i>eyetm</i>  | 1.17 [0.77, 1.52]    | 1.00 [0.61, 1.41]    | -0.89 [-1.38, -0.38] | 0.67 [0.30, 0.94] | 0.93 [0.65, 2.59]   | 0.72 [0.29, 1.00]  | 1                       | 8                               |
| <i>nb008</i>  | 1.26 [0.74, 1.71]    | 1.09 [0.63, 1.57]    | 0.47 [-0.40, 1.32]   | 0.79 [0.01, 0.99] | 1.21 [-0.59, 1.85]  | 0.52 [-0.2, 1.00]  | 0                       | 38                              |
| <i>y4wws</i>  | 1.41 [0.95, 1.80]    | 1.22 [0.78, 1.66]    | -0.71 [-1.44, 0.06]  | 0.87 [0.05, 0.98] | 1.55 [0.41, 2.02]   | 0.56 [-0.11, 1.00] | 0                       | 31                              |
| <i>ktpj5</i>  | 1.46 [0.83, 2.10]    | 1.15 [0.67, 1.77]    | 0.94 [0.29, 1.68]    | 0.77 [0.01, 0.98] | 1.28 [-0.26, 1.60]  | 0.42 [-0.27, 0.95] | 0                       | 37                              |
| <i>wuuvc</i>  | 1.47 [0.84, 2.09]    | 1.18 [0.70, 1.77]    | 0.99 [0.36, 1.68]    | 0.78 [0.01, 0.98] | 1.27 [-0.24, 1.58]  | 0.47 [-0.20, 1.00] | 0                       | 37                              |
| <i>xnoe0</i>  | 1.54 [1.09, 2.00]    | 1.39 [1.02, 1.83]    | 0.91 [0.11, 1.64]    | 0.82 [0.01, 0.98] | 1.47 [-0.30, 1.79]  | 0.42 [-0.27, 0.95] | 0                       | 37                              |
| <i>qsicn</i>  | 1.58 [1.44, 1.70]    | 1.57 [1.44, 1.70]    | -1.57 [-1.7, -1.44]  | 1.00 [0.00, 1.00] | 1.06                |                    | 0                       | 2                               |
| <i>epvmk</i>  | 1.66 [1.20, 2.15]    | 1.50 [1.07, 1.96]    | 1.12 [0.31, 1.82]    | 0.82 [0.02, 0.98] | 1.47 [-0.21, 1.8]   | 0.42 [-0.25, 0.95] | 0                       | 37                              |
| <i>4o0ia</i>  | 1.73 [1.33, 2.17]    | 1.62 [1.29, 2.02]    | 1.31 [0.53, 1.93]    | 0.87 [0.03, 0.99] | 1.50 [0.07, 1.84]   | 0.56 [-0.07, 1.00] | 0                       | 36                              |
| <i>ko8yx</i>  | 1.75 [1.08, 2.45]    | 1.44 [0.87, 2.12]    | 1.38 [0.74, 2.10]    | 0.97 [0.88, 1.00] | 1.66 [1.46, 2.28]   | 0.91 [0.69, 1.00]  | 0                       | 27                              |
| <i>2umai</i>  | 1.76 [1.21, 2.35]    | 1.54 [1.04, 2.11]    | 1.31 [0.55, 2.03]    | 0.82 [0.02, 0.98] | 1.43 [-0.02, 1.77]  | 0.47 [-0.17, 0.95] | 0                       | 37                              |
| <i>cm2yq</i>  | 1.77 [1.22, 2.36]    | 1.55 [1.06, 2.12]    | 1.33 [0.57, 2.04]    | 0.82 [0.02, 0.98] | 1.43 [-0.02, 1.76]  | 0.47 [-0.17, 0.95] | 0                       | 37                              |
| <i>nxaaw</i>  | 1.80 [0.84, 2.80]    | 1.34 [0.80, 2.18]    | 0.16 [-0.77, 1.41]   | 0.59 [0.02, 0.97] | 1.37 [-0.08, 2.92]  | 0.6 [-0.05, 1.00]  | 0                       | 30                              |
| <i>wcvnu</i>  | 1.90 [1.14, 2.64]    | 1.57 [0.97, 2.27]    | 1.44 [0.70, 2.24]    | 0.97 [0.91, 1.00] | 1.78 [1.58, 2.48]   | 0.91 [0.69, 1.00]  | 0                       | 27                              |
| <i>kxzt</i>   | 2.00 [1.13, 2.73]    | 1.64 [1.00, 2.39]    | 1.64 [1.00, 2.39]    | 0.83 [0.01, 0.98] | 1.42 [-0.21, 1.99]  | 0.56 [-0.10, 1.00] | 0                       | 38                              |
| <i>wexjs</i>  | 2.05 [1.18, 2.93]    | 1.66 [1.01, 2.47]    | 1.48 [0.63, 2.39]    | 0.96 [0.55, 0.99] | 1.87 [1.54, 2.29]   | 0.73 [0.20, 1.00]  | 0                       | 26                              |
| <i>z7fhp</i>  | 2.14 [1.38, 2.87]    | 1.80 [1.12, 2.58]    | 1.28 [0.18, 2.34]    | 0.78 [0.02, 0.98] | 1.71 [-0.41, 2.13]  | 0.42 [-0.25, 0.95] | 0                       | 30                              |
| <i>gdqeg</i>  | 2.38 [1.97, 2.71]    | 2.25 [1.74, 2.68]    | -1.61 [-2.46, -0.37] | 0.10 [0.00, 0.98] | 0.31 [-0.60, 1.63]  | 0.29 [-0.45, 1.00] | 0                       | 53                              |
| <i>8toyp</i>  | 2.63 [1.89, 3.29]    | 2.34 [1.59, 3.07]    | 1.78 [0.47, 2.89]    | 0.82 [0.02, 0.98] | 1.94 [-0.06, 2.39]  | 0.47 [-0.17, 0.95] | 0                       | 29                              |
| <i>w4z0e</i>  | 2.63 [1.81, 3.53]    | 2.34 [1.67, 3.18]    | 1.74 [0.46, 2.92]    | 0.98 [0.55, 1.00] | 2.28 [1.52, 2.41]   | 0.73 [0.20, 1.00]  | 0                       | 20                              |
| <i>arcko</i>  | 2.64 [1.23, 3.78]    | 2.08 [1.10, 3.24]    | 1.71 [0.44, 3.10]    | 0.57 [0.04, 0.95] | 1.42 [0.56, 2.93]   | 0.56 [-0.06, 1.00] | 0                       | 28                              |
| <i>0wfzo</i>  | 18.72 [11.21, 25.03] | 15.80 [9.9, 22.35]   | 15.09 [8.28, 22.12]  | 0.09 [0.01, 0.73] | 2.35 [-10.18, 8.12] | 0.02 [-0.65, 0.66] | 0                       | 12                              |
| <i>z3btx</i>  | 22.60 [15.03, 29.00] | 19.70 [12.97, 26.69] | 19.70 [12.97, 26.69] | 0.09 [0.01, 0.72] | 2.35 [-10.00, 8.28] | 0.02 [-0.66, 0.66] | 0                       | 7                               |
| <i>758j8</i>  | 23.76 [16.33, 30.24] | 21.00 [14.26, 28.00] | 21.00 [14.26, 28.00] | 0.09 [0.01, 0.71] | 2.35 [-10.34, 8.12] | 0.02 [-0.65, 0.65] | 0                       | 8                               |
| <i>hgn83</i>  | 27.91 [20.54, 34.52] | 25.60 [18.9, 32.64]  | 25.60 [18.9, 32.64]  | 0.09 [0.01, 0.72] | 2.35 [-10.21, 8.00] | 0.02 [-0.65, 0.65] | 0                       | 5                               |
